# Supplementary material for: Genomic epidemiology of Vibrio cholerae reveals the regional and global spread of two epidemic non-toxigenic lineages
Source: PLOS journal article supplement (doi:10.1371/journal.pntd.0008046), 2020-02-18
Supplement: S2 (10.1371/journal.pntd.0008046.s002) [file journal.pntd.0008046.s002]

**S2 Table. The criteria used for clinical symptom classification.**

|                        | <b>Mild</b>               | <b>Moderate</b>                                            | <b>Severe</b>                                          |
|------------------------|---------------------------|------------------------------------------------------------|--------------------------------------------------------|
| Dehydration            | <5%, child<br>2-3%, adult | 5-10%, child<br>4-8%, adult                                | >10%, child<br>>8%, adult                              |
| Stool (day)            | 4-9                       | 10-20                                                      | >20                                                    |
| Urine (day)            | Normal                    | <400 ml                                                    | <50 ml                                                 |
| General appearance     | Well, alert               | Restless, irritable                                        | Lethargic or unconscious                               |
| Voice                  | Normal                    | Hoarseness                                                 | Hoarseness                                             |
| Skin turgor            | Instantaneous recoil      | Non-instantaneous recoil                                   | Very slow recoil (>2 s)                                |
| Lips                   | Normal/slightly dry       | Dry                                                        | Dry                                                    |
| Eye socket, fontanelle | Normal/slightly Sinkage   | Sinkage                                                    | Severe sinkage                                         |
| Fingerprint            | Normal                    | Shrivelled                                                 | Severe shrivelled                                      |
| Muscle                 | Normal                    | Spasm                                                      | Severe spasm                                           |
| Pulse                  | Normal                    | Rapid, low volume                                          | Weak or absent                                         |
| Systolic pressure      | Normal                    | <9.33kPa (<70mmHg), child<br>12-9.33kPa (90-70mmHg), adult | <6.67kPa (<50mmHg), child<br><9.33kPa (<70mmHg), adult |
